# Supplementary material
Source: ML conference proceedings conference paper supplement (https://openreview.net/forum?id=vzrs42hgb0)
Supplement: supplementary_material [file attachment]

To run the code for the **DistillHGNN** model, you can choose one of the following methods:

1. **Method 1:** Manual Setup with Datasets

- Obtain the required datasets for training and testing the DistillHGNN model.
- Ensure the datasets are in the correct format as expected by the code.
- **Modify File Paths:** Update the file paths in the code to point to the locations where your datasets are stored.
- **Align Column Names:** Ensure that the column names in your datasets match those referenced in the code. You may need to rename columns in your data or adjust the code accordingly.

2. **Method 2:** Using the DHG (DeepHypergraph) Library

DHG is a deep learning library built upon PyTorch for working with Graph Neural Networks (GNNs) and Hypergraph Neural Networks (HGNNs). It simplifies the process of building and training models like DistillHGNN.

- **DHG Documentation:** Available at the GitHub Repository (<https://github.com/iMoonLab/DeepHypergraph>)
